# Supplementary material
Source: publisher site journal article supplement (https://www.dovepress.com/get_supplementary_file.php?f=342238.docx)
Supplement: Supplementary file 1 [file get_supplementary_file.php]

**Appendix 1: Detailed description of the Time-based algorithm and the Drug-based algorithm for number of lines of anti-neoplastic therapy**

***The Time-based algorithm***

One anti-neoplastic therapy treatment line is defined as administrations of anti-neoplastic therapy (any treatment code for anti-neoplastic therapy in the Danish National Patient Registry [DNPR], defined as the following sks-codes: BJHE12 and BWHA (Including all sublevels)) where there was <X days between the date of the previous administration and the date of the next administration of anti-neoplastic therapy (illustrated in sFigure 1). We validated number of anti-neoplastic therapy lines according to the *Time-based algorithm* when setting X to all numbers between and including 28 and 50.

**sFigure 1.** Illustration of the definition of anti-neoplastic therapy lines and duration of anti-neoplastic therapy lines according to the *Time-based algorithm*.

=Date with any code for anti-neoplastic therapy

time

Duration of anti-neoplastic therapy line 1 =

; line 2=

X days

X days

<X days

<X days

<X days

≥X days

**Note:** X can span from 28 to 50.

***The Drug-based algorithm***

The *Drug-based algorithm* is illustrated in sFigure 2 and follows the principles described below. In the principles, we use the following definition of “type of anti-neoplastic therapy”: consisting of one or more anti-neoplastic drugs. We defined anti-neoplastic therapy type 1 (orange arrows in sFigure 2) as consisting of the anti-neoplastic drugs given on the first date with specific codes for anti-neoplastic therapy (e.g. carboplatin+paclitaxel). If an anti-neoplastic therapy type consisted of more anti-neoplastic drugs and only one of these drugs was given on the next date of anti-neoplastic therapy (e.g. carboplatin only) without the addition of any other anti-neoplastic drugs, then this was defined as the same type of anti-neoplastic therapy (e.g. carboplatin+paclitaxel).

When identifying anti-neoplastic drugs we regarded the platinum-based chemotherapeutics carboplatin and cisplatin to be equivalent chemotherapeutics, as a change from one to the other likely represented a change due to toxicity rather than a change in line of anti-neoplastic therapy. Likewise, we regarded epirubicin and doxorubicin to be equivalent chemotherapeutics. Prednisone and dexamethasone are included in some of the treatment codes for anti-neoplastic therapy in DNPR. However, for most cancers prednisone and dexamethasone can be regarded as supportive treatment rather than having any cytotoxic effect. Therefore, we did not consider prednisone and dexamethasone as anti-neoplastic therapy drugs.

**Principles for defining anti-neoplastic therapy treatment lines**

Below we describe the principles for defining anti-neoplastic therapy lines with reference to the parts of sFigure 2 where the principles are illustrated.

*sFigure 2 a and b*: Consecutive dates with administration of the same type of anti-neoplastic therapy belonged to the same line of anti-neoplastic therapy irrespective of the number of days between the administrations.

*sFigure 2 c*: If another type of anti-neoplastic therapy was administered between dates with administration of the same type of anti-neoplastic therapy, the two separate administrations of the same type of anti-neoplastic therapy belonged to two different lines of anti-neoplastic therapy.

*sFigure 2 d*: If a date of administration of anti-neoplastic therapy without registration of the specific drug occurred between two dates with the same type of anti-neoplastic therapy, all these dates belonged to the same line of anti-neoplastic therapy.

*sFigure 2 e*: If a date of administration of anti-neoplastic therapy without registration of the specific drug occurred before the first date with specification of type of anti-neoplastic therapy and if there were <X days between the dates, these dates belonged to the same line of anti-neoplastic therapy.

*sFigure 2 f*: If a date of administration of anti-neoplastic therapy without registration of the specific drug occurred before the first date with specification of type of anti-neoplastic therapy and if there were ≥X days between the dates, these dates belonged to separate lines of anti-neoplastic therapy.

*sFigure 2 g*: If a date of administration of anti-neoplastic therapy without registration of the specific drug occurred after the last date with specification of type of anti-neoplastic therapy and if there were <X days between the dates, these dates belonged to the same line of anti-neoplastic therapy.

*sFigure 2 h*: If a date of administration of anti-neoplastic therapy without registration of the specific drug occurred after the last date with specification of type of anti-neoplastic therapy and if there were ≥X days between the dates, these dates belonged to separate lines of anti-neoplastic therapy.

*sFigure 2 i and j*: If a date of administration of anti-neoplastic therapy without registration of the specific drug occurred between two dates with different types of anti-neoplastic therapy and if there were <X days between that date and the earlier date with specification of type of anti-neoplastic therapy, this date belonged to the same line of anti-neoplastic therapy as the earlier date.

*sFigure 2 k*: If a date of administration of anti-neoplastic therapy without registration of the specific drug occurred between two dates with different types of anti-neoplastic therapy and if there were ≥X days between that date and the earlier date with specification of type of anti-neoplastic therapy and if there were <X days between that date and the later date with specification of type of anti-neoplastic therapy, this date belonged to the same line of anti-neoplastic therapy as the later date.

*sFigure 2 l*: If a date of administration of anti-neoplastic therapy without registration of the specific drug occurred between two dates with different types of anti-neoplastic therapy and if there were ≥X days between that date and both the earlier and later date with specification of type of anti-neoplastic therapy, this date belonged to a separate line of anti-neoplastic therapy.

*sFigure 2 m*: For consecutive dates of administration of anti-neoplastic therapy without registration of the specific drug, which do not fulfil any of the criteria given above, we defined that one anti-neoplastic therapy treatment line was consecutive administrations where there was <X days between the date of the previous administration and the date of the next administration.

We validated number of anti-neoplastic therapy lines according to *Drug-based algorithm* when setting X to all numbers between 28 and 50.

**sFigure 2.** Illustration of the definition of anti-neoplastic therapy treatment lines, *Drug-based algorithm*

X days

≥X days

≥X days

<X days

<X days

X days

<X days

≥X days

<X days

=Date with unspecific code for anti-neoplastic therapy

X days

time

X days

<X days

Duration of anti-neoplastic therapy line 1 =

<X days

<X days

≥X days

; line 2=

=Date with specific code(s) for anti-neoplastic therapy type 1

=Date with specific code(s) for anti-neoplastic therapy type 2

X days

X days

; line 3=

X days

X days

X days

X days

<X days

X days

X days

<X days

X days

X days

X days

X days

X days

**a)**

**b)**

**c)**

**d)**

**e)**

**f)**

≥X days

X days

X days

X days

**j)**

<X days

X days

X days

≥X days

X days

X days

**m)**

**l)**

**k)**

**i)**

**h)**

**g)**

**Appendix 2: Abstraction form for the medical chart review**

| # | Variable /Field Name | Field Label  *Field Note* | Field Attributes (Field Type, Validation, Choices, Calculations, etc.) |
| --- | --- | --- | --- |
| Instrument: Eligibility information | | | |
| 1 | record_id | Record ID | text, Identifier |
| 2 | abs | Abstractor | dropdown |
| 3 | date | Date  *DDMMYYYY* | text (date_dmy, Min: 2018-  01-01, Max: 2020-12-31) |
| 4 | cpr 1.1. | Cpr number  *Ddmmyynnnn* | text (dk_cpr) |
| 5 | diag | 1.2.  Date of cancer diagnosis  If date is unknown enter 99  If month is unknown enter 99  If year is unknown enter 9999  *DDMMYYYY* | text |
| 6 | chemo | Chemotherapy.  Did the patient receive  chemotherapy? | radio  1 Patient received chemotherapy  2 Patient did not receive chemotherapy (skip to clinical cancer progression)  3 No information in record about chemotherapy (skip to clinical cancer progression) |
| 7 | standing_coho  rt_antipdl1_ant  ibody_treatme  nt_eligib_comp  lete | Section Header: *Form Status*  Complete? | dropdown  0 Incomplete  1 Unverified  2 Complete |
| Instrument: Chemotherapy 1 (Chemotherapy_1) | | | |
| 8 | chemo date | 2.1.1.  Date of first chemotherapy  *DDMMYYYY, if day is unknown enter 99, if*  *month is unknown enter 99, if yaer is*  *unknown enter 9999* | text |
| 9 | chemo1 | 2.1.2.  What chemotherapy did the patient receive on the first date of chemotherapy | Dropdown   1. 5-fluorouracil 2. 5-fluorouracil+irinotecan 3. 5-fluorouracil+oxaliplatin 4. afatinib 5. alectinib 6. anagrelide 7. arsenic trioxide 8. axitinib 9. azacitidine 10. bendamustine 11. bleomycin 12. bortezomib 13. bosutinib 14. busulfan 15. cabazitaxel 16. cabozantinib 17. capecitabine 18. capecitabine+oxaliplatin 19. carboplatin 20. carboplatin and vinorelbine 21. carboplatin+etoposide 22. carboplatin+gemcitabine 23. carboplatin+gemcitabine+paclitaxel 24. carboplatin+paclitaxel 25. carboplatin+vincristine+etoposide 26. carfilzomib 27. CAV (=cyclophosphamide+doxorubicin+vincristine) 28. CE (=cyclophosphamide+epirubicin) 29. CEOP (=cyclophosphamide+etoposide+vincristine+prednisolone) 30. ceritinib 31. CHOP (=cyclophosphamide+doxorubicin+vincristine+prednisolone) 32. CILF (=cisplatin+ifosfamide+5-fluorouracil) 33. cisplatin 34. cisplatin and pemetrexed 35. cisplatin+docetaxel 36. cisplatin+etoposide 37. cisplatin+etoposide+bleomycin 38. cisplatin+ifosfamide+5-fluorouracil (CILF) 39. cisplatin+gemcitabine 40. cisplatin+gemcitabine+paclitaxel 41. cisplatin+topotecan 42. cisplatin+vinorelbine 43. CMF (=cyclophosphamide+methotrexate+5-fluorouracil) 44. COP (=CVP and cyclophosphamide+vincristine+prednisolone) 45. crizotinib 46. CVP (=COP and cyclophosphamide+vincristine+prednisolone) 47. Cy+dex (=cyclophosphamide+dexamethasone) 48. cyclophosphamide 49. cyclophosphamide (with forced alkalinized diuresis) 50. cyclophosphamide+dexamethasone (Cy+dex) 51. cyclophosphamide+doxorubicin+vincristine (=CAV) 52. cyclophosphamide+doxorubicin+vincristine+prednisolone (=CHOP) 53. cyclophosphamide+epirubicin (=CE) 54. cyclophosphamide+etoposide+vincristine+prednisolone (CEOP) 55. cyclophosphamide+methotrexate+5-fluorouracil (=CMF) 56. cyclophosphamide+vincristine+prednisolone (=CVP and COP) 57. intraspinal cytarabine 58. docetaxel 59. docetaxel+carboplatin 60. docetaxel+cyclophosphamide 61. docetaxel+epirubicin 62. doxorubicin 63. doxorubicin (liposomal) 64. epirubicin 65. eribulin 66. erlotinib 67. etoposide 68. fludarabine phosphate injection 69. fluorouracil + irinotecan + oxaliplatin 70. gemcitabine 71. gemcitabine+capecitabine 72. gemcitabine+oxaliplatin+capecitabine 73. gemcitabine+paclitaxel 74. gemcitabine+vinorelbine+liposomal doxorubicin (=GVD) 75. GVD (=gemcitabine+vinorelbine+liposomal doxorubicin) 76. hydroxyurea 77. high dose Ara-C 78. high dose etoposide 79. high dose melfalan (conditioning) 80. ibrutinib 81. ifosfamide 82. imatinib 83. irinotecan 84. chlorambucil+prednisolone (=LP) 85. lapatinib 86. ld-cytarabine 87. lomustine 88. LP (=chlorambucil+prednisolone) 89. melphalan 90. melphalan+prednisolone (=MP) 91. methotrexate 92. methotrexate (with forced alkalinized diuresis) 93. methotrexate+vinblastine+doxorubicin+cisplatin (=MVAC) 94. mitomycin 95. mitomycin-C 96. MP (=melphalan+prednisolone) 97. MVAC (=methotrexate+vinblastine+doxorubicin+cisplatin) 98. nab-paclitaxel 99. neratinib 100. nilotinib 101. niraparib 102. No information 103. olaparib 104. osimertinib 105. Other chemotherapy (not in the drop-down menu) 106. oxaliplatin 107. oxaliplatin+capecitabine+epirubicin 108. paclitaxel+epirubicin 109. paclitaxel 110. paclitaxel+capecitabine 111. palbociclib 112. pazopanib 113. pemetrexed 114. pixantrone 115. procarbazine 116. regorafenib 117. ruxolitinib 118. sorafenib 119. sunitinib 120. tegafur/uracil 121. tegafur/uracil+mitomycin 122. temozolomide 123. temsirolimus 124. topotecan 125. trabectedin 126. treosulfan 127. vinflunine 128. vincristine 129. vinorelbine |
| 10 | chemoother1  Show the field  ONLY if:  [chemo1] = '105' | 2.1.2.1.  What other chemotherapy? | text |
| 11 | line1 | 2.1.3.  Specification of treatment line in  the medical record? | dropdown  1 First line  2 Second line  3 Third line  4 Fourth line  5 Fifth line  6 Sixth line  7 Maintenance  8 Other information  9 No information |
| 12 | lineother1  Show the field  ONLY if:  [line1] = '8' | 2.1.3.1.  What other information? | text |
| 13 | Chemotherapy_  1_complete | Section Header: *Form Status*  Complete? | dropdown  0 Incomplete  1 Unverified  2 Complete |
| Instrument: Chemotherapy 2 (Chemotherapy_2) | | | |
| 14 | chemo date2 | 2.1.4.  Date of second chemotherapy  *DDMMYYYY, if day is unknown enter 99, if*  *month is unknown enter 99, if yaer is*  *unknown enter 9999* | text |
| 15 | chemo2 2.1.5. | What chemotherapy did the patient receive on the date of chemotherapy? | Dropdown   1. 5-fluorouracil 2. 5-fluorouracil+irinotecan 3. 5-fluorouracil+oxaliplatin 4. afatinib 5. alectinib 6. anagrelide 7. arsenic trioxide 8. axitinib 9. azacitidine 10. bendamustine 11. bleomycin 12. bortezomib 13. bosutinib 14. busulfan 15. cabazitaxel 16. cabozantinib 17. capecitabine 18. capecitabine+oxaliplatin 19. carboplatin 20. carboplatin and vinorelbine 21. carboplatin+etoposide 22. carboplatin+gemcitabine 23. carboplatin+gemcitabine+paclitaxel 24. carboplatin+paclitaxel 25. carboplatin+vincristine+etoposide 26. carfilzomib 27. CAV (=cyclophosphamide+doxorubicin+vincristine) 28. CE (=cyclophosphamide+epirubicin) 29. CEOP (=cyclophosphamide+etoposide+vincristine+prednisolone) 30. ceritinib 31. CHOP (=cyclophosphamide+doxorubicin+vincristine+prednisolone) 32. CILF (=cisplatin+ifosfamide+5-fluorouracil) 33. cisplatin 34. cisplatin and pemetrexed 35. cisplatin+docetaxel 36. cisplatin+etoposide 37. cisplatin+etoposide+bleomycin 38. cisplatin+ifosfamide+5-fluorouracil (CILF) 39. cisplatin+gemcitabine 40. cisplatin+gemcitabine+paclitaxel 41. cisplatin+topotecan 42. cisplatin+vinorelbine 43. CMF (=cyclophosphamide+methotrexate+5-fluorouracil) 44. COP (=CVP and cyclophosphamide+vincristine+prednisolone) 45. crizotinib 46. CVP (=COP and cyclophosphamide+vincristine+prednisolone) 47. Cy+dex (=cyclophosphamide+dexamethasone) 48. cyclophosphamide 49. cyclophosphamide (with forced alkalinized diuresis) 50. cyclophosphamide+dexamethasone (Cy+dex) 51. cyclophosphamide+doxorubicin+vincristine (=CAV) 52. cyclophosphamide+doxorubicin+vincristine+prednisolone (=CHOP) 53. cyclophosphamide+epirubicin (=CE) 54. cyclophosphamide+etoposide+vincristine+prednisolone (CEOP) 55. cyclophosphamide+methotrexate+5-fluorouracil (=CMF) 56. cyclophosphamide+vincristine+prednisolone (=CVP and COP) 57. intraspinal cytarabine 58. docetaxel 59. docetaxel+carboplatin 60. docetaxel+cyclophosphamide 61. docetaxel+epirubicin 62. doxorubicin 63. doxorubicin (liposomal) 64. epirubicin 65. eribulin 66. erlotinib 67. etoposide 68. fludarabine phosphate injection 69. fluorouracil + irinotecan + oxaliplatin 70. gemcitabine 71. gemcitabine+capecitabine 72. gemcitabine+oxaliplatin+capecitabine 73. gemcitabine+paclitaxel 74. gemcitabine+vinorelbine+liposomal doxorubicin (=GVD) 75. GVD (=gemcitabine+vinorelbine+liposomal doxorubicin) 76. hydroxyurea 77. high dose Ara-C 78. high dose etoposide 79. high dose melfalan (conditioning) 80. ibrutinib 81. ifosfamide 82. imatinib 83. irinotecan 84. chlorambucil+prednisolone (=LP) 85. lapatinib 86. ld-cytarabine 87. lomustine 88. LP (=chlorambucil+prednisolone) 89. melphalan 90. melphalan+prednisolone (=MP) 91. methotrexate 92. methotrexate (with forced alkalinized diuresis) 93. methotrexate+vinblastine+doxorubicin+cisplatin (=MVAC) 94. mitomycin 95. mitomycin-C 96. MP (=melphalan+prednisolone) 97. MVAC (=methotrexate+vinblastine+doxorubicin+cisplatin) 98. nab-paclitaxel 99. neratinib 100. nilotinib 101. niraparib 102. No information 103. olaparib 104. osimertinib 105. Other chemotherapy (not in the drop-down menu) 106. oxaliplatin 107. oxaliplatin+capecitabine+epirubicin 108. paclitaxel+epirubicin 109. paclitaxel 110. paclitaxel+capecitabine 111. palbociclib 112. pazopanib 113. pemetrexed 114. pixantrone 115. procarbazine 116. regorafenib 117. ruxolitinib 118. sorafenib 119. sunitinib 120. tegafur/uracil 121. tegafur/uracil+mitomycin 122. temozolomide 123. temsirolimus 124. topotecan 125. trabectedin 126. treosulfan 127. vinflunine 128. vincristine 129. vinorelbine |
| 16 | chemoother2  Show the field  ONLY if:  [chemo2] = '105' | 2.1.5.1.  What other chemotherapy? | text |
| 17 | line2 | 2.1.6.  Specification of treatment line in  the medical record? | dropdown  1 First line  2 Second line  3 Third line  4 Fourth line  5 Fifth line  6 Sixth line  7 Maintenance  8 Other information  9 No information |
| 18 | lineother2  Show the field  ONLY if:  [line2] = '8' | 2.1.6.1.  What other information? | text |
| 19 | change2 | 2.1.7.  Is there information in the record  about that the date of  chemotherapy represent a  change in treatment line? | yesno  1 Yes  0 No |
| 20 | reason2  Show the field  ONLY if:  [change2] = '1' | 2.1.7.1.  What was the reason to change  chemotherapy line? | checkbox  1 reason2___1 No reason stated  2 reason2___2 CT-scan results  3 reason2___3 MR-scan results  4 reason2___4 X-ray results  5 reason2___5 Ultrasound imaging results  6 reason2___6 Physical exam  7 reason2___7 Side effects to previous treatment line  8 reason2___8 Other information |
| 21 | reasonother2  Show the field  ONLY if:  [reason2(8)] ='1' | 2.1.7.2.  What other information? | text |
| 22 | Chemotherapy_2_complete | Section Header: *Form Status*  Complete? | dropdown  0 Incomplete  1 Unverified  2 Complete |
| Instrument: Chemotherapy 3 to Chemotherapy 95 (similar to chemotherapy_2) | | | |

**Note:** #=instrument number

**Appendix 3: Estimation of positive predictive values**

**sTable 1.** Terminology and definition of positive predictive value for at least the given number of anti-neoplastic therapy lines

|  |  | **Start anti-neoplastic therapy line X (reference standard)** | |
| --- | --- | --- | --- |
|  |  | Yes (Start line X) | No (Do not start line X) |
| **Start anti-neoplastic therapy line X according to the algorithm** | Yes (Start line X) | True positive (TP) | False positive (FP) |
| No (Do not start line X) | False negative (FN) | True negative (TN) |
| **Positive predictive value:**  TP/(TP+FP) | Percentage of patients who have started anti-neoplastic therapy line X according to the reference standard among patients who have started anti-neoplastic therapy line X according to the algorithm. | | |

**Notes:** X can be set at 1, 2 or 3; the algorithm is either *Time-based algorithm* 45 days or *Drug-based algorithm* 45 days. The reference standard is from the medical records review.

**sTable 2.** Terminology and definition of positive predictive value for start date of anti-neoplastic therapy lines

|  |  | **Start line X and start date of line X (reference standard)** | |
| --- | --- | --- | --- |
|  |  | Start line X and start date ≤ Y days different from the start date of line X according to the algorithm | Do not start line X or start date >Y days different from the start date of line X according to the algorithm |
| **Start line X according to the algorithm** | Start line X | True positive (TP) | False positive (FP) |
| Do not start line X | False negative (FN) | True negative (TN) |
| **Positive predictive value:**  TP/(TP+FP) | Percentage of patients who have started anti-neoplastic therapy line X according to the reference standard and for whom the start date of line X according to the reference standard is Y days or less different from the start date according to the algorithm among patients who have started anti-neoplastic therapy line X according to the algorithm. | | |

**Notes:** X can be set at 1, 2 or 3; Y can be set at 30, 60 and 90; the Time-based algorithms either *Time-based algorithm* 45 days or *Drug-based algorithm* 45 days. The start of line X is the first date of administration of anti-neoplastic therapy in that line. The reference standard is from the medical records review.

**sTable 3.** Terminology and definition of positive predictive value for duration of anti-neoplastic therapy lines

|  |  | **Start line X and duration of line X (reference standard)** | |
| --- | --- | --- | --- |
|  |  | Start line X and duration of line X ≤ Y days different from the duration of line X according to the algorithm | Do not start line X or duration of line X >Y days different from the duration of line X according to the algorithm |
| **Start line X according to the algorithm** | Start line X | True positive (TP) | False positive (FP) |
| Do not start line X | False negative (FN) | True negative (TN) |
| **Positive predictive value:**  TP/(TP+FP) | Percentage of patients who have started anti-neoplastic therapy line X according to the reference standard and for whom the duration of line X according to the reference standard is Y days or less different from the duration according to the algorithm among patients who have started anti-neoplastic therapy line X according to the algorithm. | | |

**Notes:** X can be set at 1, 2 or 3; Y can be set at 30, 60 and 90; the Time-based algorithms either *Time-based algorithm* 45 days or *Drug-based algorithm* 45 days. Duration of line X is calculated as last date of administration of anti-neoplastic therapy in line X minus the first date of administration of anti-neoplastic therapy in line X plus 45 days. The reference standard is from the medical records review.

**Appendix 4: SAS code for anti-neoplastic drug groups**

/*************************************************************************************

** DESCRIPTION:

** Macro, that defines anti-neoplastic therapy in an in-hospital treatment database

** and the specified and unspecified anti-neoplastic drug groups according to

** treatment codes from the Danish National Patient Registry. Defining

** these drug groups is necessary before using the anti-neoplastic therapy line

** defining macro (%anti_neoplastic_therapy_line()).

** The syntax also contains optional formats of the anti-neoplastic drug

** groups for those, who find them useful.

** At the end of the syntax there is an example of code you could write to run

** the macro on your own data.

**

** PARAMETERS:

** in_ds: Name of the input dataset with the in-hospital treatment

** information.

** out_ds: Name of the output dataset with anti-neoplastic therapy and

** anti-neoplastic drug groups.

** id_var: Name of the personal ID variable in the input dataset.

** date_var: Name of the treatment date variable in the input dataset.

** code_var: Name of the treatment code variable in the input dataset,

** This variable is used for defining anti-neoplastic therapy and

** anti-neoplastic drug groups.

** add_code: Specify if there's an additional treatment code (it could be

** 'tillægskoder' in Danish) in the input dataset.

** y = yes (default), n = no.

** add_code_var: Name of the additional treatment code variable in the input

** dataset. This variable can also be used for defining

** anti-neoplastic therapy and anti-neoplastic drug groups,

** but only if add_code = y is set. It can be left blank,

** if additional treatment codes are not needed.

** del: Specify if temporary datasets created by the macro should be

** deleted. y = yes (default), n = no.

**************************************************************************************

** AUTHOR: Bianka Darvalics

** CREATION DATE: 30.08.2019

**************************************************************************************

*************************************************************************************/

%macro anti_neoplastic_drug_groups(

in_ds = ,

out_ds = ,

id_var = ,

date_var = ,

code_var = ,

add_code = y,

add_code_var = ,

del = y

);

option minoperator;

%put;

%put Macro &sysmacroname is executing;

%put;

/**********************************************************************************

CODES

**********************************************************************************/

/*

Define anti-neoplastic therapy drug groups according to treatment codes from the

Danish National Patient Registry (DNPR).

Note 1: you might need to add some codes, if new codes have been implemented

since the creation of this syntax, or if some treatment codes have been redefined.

Note 2: the value 0 for the anti-neoplastic therapy drug group variable

(anti_n_drug_group) is used for the unspecified anti-neoplastic drugs. This should

not be changed, so the anti-neoplastic therapy line defining macro

(%anti_neoplastic_therapy_line()) could work properly.

*/

%local i anti_n_drug_all_N anti_n_all_codes;

%let anti_n_drug_all_N = 101;

%do i=0 %to &anti_n_drug_all_N.;

%local anti_n_drug_&i._codes;

%end;

%let anti_n_all_codes= "BJHE12" "BWHA";

/*5-fluorouracil*/

%let anti_n_drug_1_codes= "BWHA110" "BWHA117" "BWHA118" "BWHA132" "BWHA146"

"BWHA231" "BWHA232" "BWHA233" "BWHA234" "BWHA251";

/*abemaciclib*/

%let anti_n_drug_2_codes= "BWHA444";

/*actinomycin-D*/

%let anti_n_drug_3_codes= "BWHA121" "BWHA122" "BWHA241";

/*afatinib*/

%let anti_n_drug_4_codes= "BWHA417";

/*alectinib*/

%let anti_n_drug_5_codes= "BWHA440";

/*alisertib*/

%let anti_n_drug_6_codes= "BWHA421";

/*alpelisib*/

%let anti_n_drug_7_codes= "BWHA441";

/*anagrelid*/

%let anti_n_drug_8_codes= "BWHA415";

/*anthracyline*/

%let anti_n_drug_9_codes= "BWHA102" "BWHA103" "BWHA118" "BWHA119" "BWHA131"

"BWHA138" "BWHA139" "BWHA144" "BWHA146" "BWHA165"

"BWHA167" "BWHA170" "BWHA183" "BWHA184" "BWHA185"

"BWHA204" "BWHA210" "BWHA216" "BWHA223" "BWHA232"

"BWHA237" "BWHA258" "BWHA259" "BWHA260" "BWHA143"

"BWHA221" "BWHA250" "BWHA307";

/*arsentrioxid*/

%let anti_n_drug_10_codes= "BWHA443";

/*asparaginase*/

%let anti_n_drug_11_codes= "BWHA188";

/*axitinib*/

%let anti_n_drug_12_codes= "BWHA426";

/*azacitidin*/

%let anti_n_drug_13_codes= "BWHA256";

/*BCNU*/

%let anti_n_drug_14_codes= "BWHA310" "BWHA133";

/*bendamustin*/

%let anti_n_drug_15_codes= "BWHA177";

/*bleomycin*/

%let anti_n_drug_16_codes= "BWHA138" "BWHA150" "BWHA157" "BWHA167" "BWHA201"

"BWHA207" "BWHA224";

/*bortezomib*/

%let anti_n_drug_17_codes= "BWHA402" "BWHA42";

/*bosutinib*/

%let anti_n_drug_18_codes= "BWHA425";

/*busulfan*/

%let anti_n_drug_19_codes= "BWHA182" "BWHA312";

/*cabazitaxel*/

%let anti_n_drug_20_codes= "BWHA263";

/*cabozantinib*/

%let anti_n_drug_21_codes= "BWHA424";

/*capecitabin*/

%let anti_n_drug_22_codes= "BWHA123" "BWHA205" "BWHA222" "BWHA223" "BWHA236"

"BWHA253" "BWHA254";

/*carfilzomib*/

%let anti_n_drug_23_codes= "BWHA432";

/*ceretinib*/

%let anti_n_drug_24_codes= "BWHA431";

/*cladribin*/

%let anti_n_drug_25_codes= "BWHA178";

/*crizotinib*/

%let anti_n_drug_26_codes= "BWHA413";

/*cyclophosphamid*/

%let anti_n_drug_27_codes= "BWHA105" "BWHA117" "BWHA118" "BWHA119" "BWHA134"

"BWHA241" "BWHA247" "BWHA258" "BWHA138" "BWHA139"

"BWHA144" "BWHA156" "BWHA160" "BWHA164" "BWHA165"

"BWHA166" "BWHA174" "BWHA175" "BWHA176" "BWHA218"

"BWHA221" "BWHA307" "BWHA311" "BWHA312" "BWHA143";

/*cytarabin*/

%let anti_n_drug_28_codes= "BWHA158" "BWHA161" "BWHA162" "BWHA163" "BWHA301"

"BWHA302" "BWHA303" "BWHA304" "BWHA307" "BWHA308"

"BWHA310";

/*dabrafenib*/

%let anti_n_drug_29_codes= "BWHA419";

/*dacarbazin*/

%let anti_n_drug_30_codes= "BWHA145" "BWHA167";

/*dasatinib*/

%let anti_n_drug_31_codes= "BWHA411";

/*daunorubicin*/

%let anti_n_drug_32_codes= "BWHA303";

/*eribulin*/

%let anti_n_drug_33_codes= "BWHA262";

/*erlotinib*/

%let anti_n_drug_34_codes= "BWHA404" "BWHA44";

/*etoposid*/

%let anti_n_drug_35_codes= "BWHA111" "BWHA112" "BWHA120" "BWHA127" "BWHA133"

"BWHA138" "BWHA140" "BWHA157" "BWHA164" "BWHA165"

"BWHA183" "BWHA201" "BWHA207" "BWHA214" "BWHA254"

"BWHA305" "BWHA306" "BWHA308" "BWHA310";

/*fludarabin*/

%let anti_n_drug_36_codes= "BWHA172" "BWHA173" "BWHA174" "BWHA175" "BWHA176"

"BWHA217" "BWHA304" "BWHA116";

/*ftorafur*/

%let anti_n_drug_37_codes= "BWHA124";

/*gemcitabin*/

%let anti_n_drug_38_codes= "BWHA114" "BWHA128" "BWHA129" "BWHA170" "BWHA206"

"BWHA211" "BWHA235" "BWHA236" "BWHA238" "BWHA253"

"BWHA259";

/*hexalen*/

%let anti_n_drug_39_codes= "BWHA125";

/*hydroxurea*/

%let anti_n_drug_40_codes= "BWHA181";

/*ibrutinib*/

%let anti_n_drug_41_codes= "BWHA427";

/*idarubicin*/

%let anti_n_drug_42_codes= "BWHA304";

/*idelalisib*/

%let anti_n_drug_43_codes= "BWHA428";

/*ifosfamid*/

%let anti_n_drug_44_codes= "BWHA106" "BWHA120" "BWHA183" "BWHA251" "BWHA308";

/*imatinib*/

%let anti_n_drug_45_codes= "BWHA401" "BWHA41";

/*irinotecan*/

%let anti_n_drug_46_codes= "BWHA212" "BWHA225" "BWHA233" "BWHA234";

/*ixazomib*/

%let anti_n_drug_47_codes= "BWHA439";

/*klorambucil*/

%let anti_n_drug_48_codes= "BWHA168" "BWHA171";

/*lapatinib*/

%let anti_n_drug_49_codes= "BWHA405" "BWHA45";

/*lomustin*/

%let anti_n_drug_50_codes= "BWHA155" "BWHA261";

/*M2*/

%let anti_n_drug_51_codes= "BWHA136";

/*mAMSA*/

%let anti_n_drug_52_codes= "BWHA305";

/*melphalan*/

%let anti_n_drug_53_codes= "BWHA154" "BWHA159" "BWHA309" "BWHA310";

/*merestinib*/

%let anti_n_drug_54_codes= "BWHA435";

/*methotrexat*/

%let anti_n_drug_55_codes= "BWHA115" "BWHA117" "BWHA120" "BWHA122" "BWHA130"

"BWHA161" "BWHA184" "BWHA185" "BWHA219" "BWHA307";

/*methyl-GAG*/

%let anti_n_drug_56_codes= "BWHA120";

/*mitomycin*/

%let anti_n_drug_57_codes= "BJHE12A" "BWHA142" "BWHA151";

/*mitoxantron*/

%let anti_n_drug_58_codes= "BWHA104" "BWHA137" "BWHA166" "BWHA176" "BWHA302";

/*nelarabin*/

%let anti_n_drug_59_codes= "BWHA187";

/*neratinib*/

%let anti_n_drug_60_codes= "BWHA414";

/*nilotinib*/

%let anti_n_drug_61_codes= "BWHA409" "BWHA49";

/*niraparib*/

%let anti_n_drug_62_codes= "BWHA437";

/*olaparib*/

%let anti_n_drug_63_codes= "BWHA433";

/*osimertinib*/

%let anti_n_drug_64_codes= "BWHA434";

/*palbociclib*/

%let anti_n_drug_65_codes= "BWHA442";

/*panobinostat*/

%let anti_n_drug_66_codes= "BWHA445";

/*pazopanib*/

%let anti_n_drug_67_codes= "BWHA410";

/*pemetrexed*/

%let anti_n_drug_68_codes= "BWHA239" "BWHA240";

/*pixantron*/

%let anti_n_drug_69_codes= "BWHA189";

/*platin*/

%let anti_n_drug_70_codes= "BWHA107" "BWHA109" "BWHA112" "BWHA126" "BWHA127"

"BWHA128" "BWHA129" "BWHA130" "BWHA132" "BWHA133"

"BWHA140" "BWHA157" "BWHA184" "BWHA185" "BWHA201"

"BWHA203" "BWHA206" "BWHA207" "BWHA209" "BWHA214"

"BWHA224" "BWHA225" "BWHA226" "BWHA238" "BWHA240"

"BWHA242" "BWHA251" "BWHA252" "BWHA261";

/*ponatinib*/

%let anti_n_drug_71_codes= "BWHA429";

/*procarbazin*/

%let anti_n_drug_72_codes= "BWHA138" "BWHA152" "BWHA156" "BWHA168";

/*pxd101*/

%let anti_n_drug_73_codes= "BWHA260";

/*regorafenib*/

%let anti_n_drug_74_codes= "BWHA422";

/*ribociclib*/

%let anti_n_drug_75_codes= "BWHA430";

/*ridaforolimus*/

%let anti_n_drug_76_codes= "BWHA423";

/*ruxolitinib*/

%let anti_n_drug_77_codes= "BWHA418";

/*sorafenib*/

%let anti_n_drug_78_codes= "BWHA407" "BWHA47";

/*sunitinib*/

%let anti_n_drug_79_codes= "BWHA406" "BWHA46";

/*paclitaxel*/

%let anti_n_drug_80_codes= "BWHA202" "BWHA202A" "BWHA203" "BWHA204" "BWHA205"

"BWHA206" "BWHA207" "BWHA235" "BWHA238";

/*tegafur_uracil*/

%let anti_n_drug_81_codes= "BWHA141" "BWHA142";

/*temozolomid*/

%let anti_n_drug_82_codes= "BWHA215";

/*temsirolimus*/

%let anti_n_drug_83_codes= "BWHA408" "BWHA48";

/*tioguanin*/

%let anti_n_drug_84_codes= "BWHA186";

/*tipifarnib*/

%let anti_n_drug_85_codes= "BWHA403" "BWHA43";

/*tivozanib*/

%let anti_n_drug_86_codes= "BWHA436";

/*topotecan*/

%let anti_n_drug_87_codes= "BWHA213" "BWHA214" "BWHA226";

/*trabectedin*/

%let anti_n_drug_88_codes= "BWHA255";

/*trametinib*/

%let anti_n_drug_89_codes= "BWHA420";

/*treosulfan*/

%let anti_n_drug_90_codes= "BWHA101";

/*tretionin*/

%let anti_n_drug_91_codes= "BWHA179";

/*trofosfamid*/

%let anti_n_drug_92_codes= "BWHA190";

/*vemurafenib*/

%let anti_n_drug_93_codes= "BWHA416";

/*venetoclax*/

%let anti_n_drug_94_codes= "BWHA438";

/*vinblastin*/

%let anti_n_drug_95_codes= "BWHA169" "BWHA130" "BWHA131" "BWHA167" "BWHA168"

"BWHA170" "BWHA185";

/*vinflunin*/

%let anti_n_drug_96_codes= "BWHA257";

/*vinkristin*/

%let anti_n_drug_97_codes= "BWHA119" "BWHA127" "BWHA134" "BWHA135" "BWHA137"

"BWHA138" "BWHA144" "BWHA153" "BWHA156" "BWHA164"

"BWHA165" "BWHA166" "BWHA183" "BWHA216" "BWHA241"

"BWHA258" "BWHA261" "BWHA307" "BWHA143" "BWHA221";

/*vinorelbin*/

%let anti_n_drug_98_codes= "BWHA113" "BWHA126" "BWHA242" "BWHA259";

/*vorinostat*/

%let anti_n_drug_99_codes= "BWHA412";

/*oxaliplatin*/

%let anti_n_drug_100_codes= "BWHA108" "BWHA222" "BWHA223" "BWHA231" "BWHA234"

"BWHA253" "BWHA254";

/*docetaxel*/

%let anti_n_drug_101_codes= "BWHA208" "BWHA209" "BWHA210" "BWHA211" "BWHA247"

"BWHA252";

%local anti_n_drug_all_codes;

%let anti_n_drug_all_codes=;

%do i=1 %to &anti_n_drug_all_N.;

%let anti_n_drug_all_codes= &anti_n_drug_all_codes. &&anti_n_drug_&i._codes;

%end;

/**********************************************************************************

Extract anti-neoplastic therapy and define anti-neoplastic drug groups from &in_ds

**********************************************************************************/

data _anti_n_1;

set &in_ds;

if &code_var in: (&anti_n_all_codes)

%if &add_code = y %then %do;

or &add_code_var in: (&anti_n_all_codes);

%end;

;

run;

/*Specified anti-neoplastic drug groups*/

data _anti_n_2;

set _anti_n_1;

format anti_n_date date9.;

if &code_var in (&anti_n_drug_all_codes.)

%if &add_code = y %then %do;

or &add_code_var in (&anti_n_drug_all_codes.)

%end;

then do;

%do i = 1 %to &anti_n_drug_all_N.;

if &code_var in (&&anti_n_drug_&i._codes)

%if &add_code = y %then %do;

or &add_code_var in (&&anti_n_drug_&i._codes)

%end;

then do;

anti_n_drug_group = &i.;

anti_n_date = &date_var;

output;

end;

%end;

end;

else do;

anti_n_drug_group = 0;

anti_n_date = &date_var;

output;

end;

run;

proc sort data = _anti_n_2 nodupkey out = &out_ds;

by &id_var anti_n_date anti_n_drug_group;

run;

/*Delete temporary datasets, if the macro variable &del = y.*/

%if &del = y %then %do;

proc datasets nodetails nolist;

delete _anti_n_:;

run;

quit;

%end;

%put;

%put Macro &sysmacroname has ended;

%put;

%mend anti_neoplastic_drug_groups;

/********* Formats for the grouping variable on the anti-neoplastic drugs *******/

/*

proc format;

value anti_n_drug_group

0 ='unspecified anti-neoplastic drug'

1 ='5-fluorouracil'

2 ='abemaciclib'

3 ='actinomycin-D'

4 ='afatinib'

5 ='alectinib'

6 ='alisertib'

7 ='alpelisib'

8 ='anagrelid'

9 ='anthracyline'

10='arsentrioxid'

11='asparaginase '

12='axitinib'

13='azacitidin'

14='BCNU'

15='bendamustin'

16='bleomycin'

17='bortezomib'

18='bosutinib'

19='busulfan'

20='cabazitaxel'

21='cabozantinib'

22='capecitabin'

23='carfilzomib'

24='ceretinib'

25='cladribin'

26='crizotinib'

27='cyclophosphamid'

28='cytarabin'

29='dabrafenib'

30='dacarbazin'

31='dasatinib'

32='daunorubicin'

33='eribulin'

34='erlotinib'

35='etoposid'

36='fludarabin'

37='ftorafur'

38='gemcitabin'

39='hexalen'

40='hydroxurea'

41='ibrutinib'

42='idarubicin'

43='idelalisib'

44='ifosfamid'

45='imatinib'

46='irinotecan'

47='ixazomib'

48='klorambucil'

49='lapatinib'

50='lomustin'

51='M2'

52='mAMSA'

53='melphalan'

54='merestinib'

55='methotrexat'

56='methyl-GAG'

57='mitomycin'

58='mitoxantron'

59='nelarabin'

60='neratinib'

61='nilotinib'

62='niraparib'

63='olaparib'

64='osimertinib'

65='palbociclib'

66='panobinostat'

67='pazopanib'

68='pemetrexed'

69='pixantron'

70='platin'

71='ponatinib'

72='procarbazin'

73='pxd101'

74='regorafenib'

75='ribociclib'

76='ridaforolimus'

77='ruxolitinib'

78='sorafenib'

79='sunitinib'

80='paclitaxel'

81='tegafur_uracil '

82='temozolomid'

83='temsirolimus'

84='tioguanin'

85='tipifarnib'

86='tivozanib'

87='topotecan'

88='trabectedin'

89='trametinib'

90='treosulfan'

91='tretionin'

92='trofosfamid'

93='vemurafenib'

94='venetoclax'

95='vinblastin'

96='vinflunin'

97='vinkristin'

98='vinorelbin'

99='vorinostat'

100='oxaliplatin'

101='docetaxel';

run;

*/

/*********************************************************************************/

/*Example:*/

/*

%anti_neoplastic_drug_groups(

in_ds = 'name of your input dataset',

out_ds = 'name of your output dataset',

id_var = 'name of ID variable',

date_var = 'name of anti-neoplastic therapy date variable',

code_var = 'name of variable holding main treatment code for

anti-neoplastic therapy',

add_code = y [y indicates that additional treatment codes should be used]

add_code_var = 'name of variable holding additional treatment codes for

anti-neoplastic therapy',

del = y [y indicates that you want temporaty datasets deleted]

);

*/

/*********************************************************************************/

**Note:** * is used to indicate explanations to the code.

**Appendix 5: SAS code for anti-neoplastic therapy line**

/**************************************************************************************

** DESCRIPTION:

** Macro, that defines anti-neoplastic therapy lines using specified and unspecified

** anti-neoplastic drug codes. This algorithm can be used on the output dataset

** of the macro that defines anti-neoplastic therapy and the anti-neoplastic drug

** groups in an in-hopital treatment dataset (%anti_neoplastic_drug_groups()),

** or on an arbitrary dataset where there is a separate record for each date of

** anti-neoplastic therapy contact, and for each anti-neoplastic drugs used during

** that contact. It means, if a patient received multiple anti-neoplastic drugs on

** the same date, he/she will have multiple records in the dataset, one for each

** anti-neoplastic drugs. The anti-neoplastic drugs should be defined as a numeric

** group variable on an arbirtrary scale (eg.: 0-101), but using

** anti_n_drug_group = 0 to identify unspecified anti-neoplastic drugs.

** The patient ID variable should have the same name as in the population_ds.

** At the end of the syntax there is an example of code you could write to run the

** macro on a simulated data.

** The macro defines the further new variables:

** anti_n_line: Sequential number of the anti-neoplastic therapy line.

** anti_n_line_start: Start date of the line.

** anti_n_line_end: End date of the line.

** anti_n_line_duration: Duration of the line (in days).

** anti_n_drug_group:: Array for the anti-neoplastic drug groups that defined

** the line.

**

** PARAMETERS:

** population_ds: Name of the input dataset with the study population. This

** dataset ensures, that anti-neoplastic therapy lines are only

** defined for patients included in the study population, and

** it is calculated in the follow-up period of interest. In the

** dataset there needs to be a variable for

** patient ID (id_var),

** index date (index_date) and

** end of follow-up date (follow_up_end_date).

** anti_n_drug_ds: Name of the input dataset with the anti-neoplastic therapy

** records and the defined anti-neoplastic drug groups variable.

** The macro %anti_neoplastic_drug_groups() creates such a

** dataset, but it can be created without the macro as well.

** In the dataset there needs to be a variable for:

** patient ID (id_var),

** date of anti-neoplastic therapy (anti_n_date) and

** anti-neoplastic drug group (anti_n_drug_group).

** out_ds: Name of the output dataset with the defined new variables.

** This dataset has a separate line for each anti-neoplastic

** therapy line the patient had.

** id_var: Name of the personal ID variable in the study population

** dataset and in the dataset with the anti-neoplastic therapy

** records. Note, that they have to have the same name in those

** 2 datasets.

** index_date: Name of the index date variable in the study population

** dataset.

** follow_up_end_date: Name of the end of follow-up date variable in the study

** population dataset.

** days: Number of days used in the algorithm. According to our

** validation study the optimal number of days is 45 days,

** therefore it is set to default.

** long_format: Specifiy if a long formatted data with all the anti-neoplastic

** therapy records should be included as well. The long formatted

** data will have the same format as the dataset anti_n_drug_ds,

** eg. it has a separate line for each date of anti-neoplastic

** therapy contact and anti-neoplastic drug used in that contact,

** and it will include the new variables the macro defines.

** y = yes (default), n = no.

** del: Specify if temporary datasets created by the macro should be

** deleted. y = yes (default), n = no.

**************************************************************************************

** AUTHOR: Bianka Darvalics

** CREATION DATE: 14.10.2019

**************************************************************************************

*************************************************************************************/

%macro anti_neoplastic_therapy_line(

population_ds = ,

anti_n_drug_ds = ,

out_ds = ,

id_var = ,

index_date = ,

follow_up_end_date = ,

days = 45,

long_format = y,

del = y

);

option minoperator;

%put;

%put Macro &sysmacroname is executing;

%put;

%local i j k all_anti_n_drugs max_number_of_drugs anti_n_drug_all_N;

/*Number of possible anti-neoplastic drug groups in the &anti_n_drug_ds

dataset.

Note: you might need to change this macro variable, if you use different

groupings than the groupings made by the %anti_neoplastic_drug_groups() macro,

or new codes have been implemented since the creation of this syntax,

or if some treatment codes have been redefined.*/

%let anti_n_drug_all_N = 101;

/*Merge the population data (&population_ds) to the anti-neoplastic therapy

dataset with the predefined anti-neoplastic drug groups.*/

proc sql;

create table _anti_n_drug_00 as

select a.&id_var, a.&index_date, a.&follow_up_end_date, b.anti_n_date,

b.anti_n_drug_group

from &population_ds as a

left join &anti_n_drug_ds as b

on a.&id_var = b.&id_var and

a.&index_date <= b.anti_n_date <= a.&follow_up_end_date

order by a.&id_var, b.anti_n_date, b.anti_n_drug_group;

quit;

/*Calculate the number of anti-neoplastic drugs on the same

date by patient for each date (number_of_drugs variable).*/

proc sql;

create table _anti_n_drug_01 as

select *, count(anti_n_date) as number_of_drugs

from _anti_n_drug_00 as a

group by a.&id_var, a.anti_n_date

order by a.&id_var, a.anti_n_date, a.anti_n_drug_group;

quit;

/*One-way frequency tables on:

1) Number of anti-neoplastic drugs used on the same date

2) Anti-neoplastic drugs used in the population

to check the feasability of the data.*/

proc freq data = _anti_n_drug_01;

tables number_of_drugs anti_n_drug_group;

run;

/*Delete those records whit unspecified anti-neoplastic drug registered in

the same date as a specified anti_n drug.*/

data _anti_n_drug_02;

set _anti_n_drug_01;

if number_of_drugs > 1 and anti_n_drug_group = 0 then delete;

drop number_of_drugs;

run;

/*Recalculate the number of anti-neoplastic drugs on the same

date by patient for each date (number_of_drugs variable).*/

proc sql;

create table _anti_n_drug_03 as

select *, count(anti_n_date) as number_of_drugs

from _anti_n_drug_02 as a

group by a.&id_var, a.anti_n_date

order by a.&id_var, a.anti_n_date, a.anti_n_drug_group;

quit;

/*Make a macro variable to save the type of drugs used in the &population_ds

dataset.*/

proc freq data = _anti_n_drug_03 ;

tables anti_n_drug_group / out = _freq_anti_n_drug_group_00;

run;

data _freq_anti_n_drug_group_01;

set _freq_anti_n_drug_group_00;

if anti_n_drug_group ^=.;

run;

proc sql noprint;

select anti_n_drug_group into :all_anti_n_drugs separated by ' '

from _freq_anti_n_drug_group_01;

quit;

%put The type of drugs used in the &population_ds dataset are:

&all_anti_n_drugs;

/*Make a macro variable to save the maximum number of drugs one person

recieved on the same date in the &population_ds dataset.*/

proc freq data = _anti_n_drug_03;

tables number_of_drugs / out = _freq_number_of_drugs_00;

run;

data _freq_number_of_drugs_01;

set _freq_number_of_drugs_00;

by number_of_drugs;

if last.number_of_drugs

then call symput("max_number_of_drugs",left(put(number_of_drugs,2.)));

run;

%put The maximum number of drugs one person recieved on the same date in the

&population_ds dataset is: &max_number_of_drugs;

/******************************************************************************/

/****************** Define anti_n lines for the specified drugs ***************/

/******************************************************************************/

/*Keep only the records with specied anti-neoplastic drugs.*/

data _anti_n_drug_specified_00;

set _anti_n_drug_03;

if anti_n_drug_group ^= 0;

run;

/*Transpose the drug groups by date. The number of the columns represent how

many was the maximum number of drugs one person recieved on the same date.

The number of columns will be equal to the value in the macro variable:

&max_number_of_drugs*/

proc transpose data = _anti_n_drug_specified_00

out =_anti_n_drug_TA_00(drop = _NAME_)

prefix = _anti_n_drug_group;

var anti_n_drug_group;

by &id_var anti_n_date;

run;

/*Transpose the dataset by date for all possible values for the drug groups

in &population_ds dataset. This will create indicator functions (0,1) for

each drug.*/

data _anti_n_drug_specified_01;

set _anti_n_drug_specified_00;

/*Dummy indicator is necessary to have the value 1 in the anti-neoplastic

drug's indicator variable after the transpose procedure, if the patient

received that drug on the specific date.*/

dummy_indicator = 1;

run;

proc transpose data = _anti_n_drug_specified_01

out =_anti_n_drug_TB_00(drop = _NAME_)

prefix = _anti_n_drug;

id anti_n_drug_group;

var dummy_indicator;

by &id_var anti_n_date;

run;

/*Set the indicators to 0 if it is missing in the new transposed dataset.

Do it only for those included in the macro variable &all_anti_n_drugs, so

it won't make unnecessary indicators in the new transposed dataset.*/

data _anti_n_drug_TB_01;

set _anti_n_drug_TB_00;

%do i = 0 %to &anti_n_drug_all_N;

%if &i in (&all_anti_n_drugs) %then %do;

if _anti_n_drug&i. =. then _anti_n_drug&i. = 0;

%end;

%end;

run;

/*Merge the 2 transposed data to get a better overview of the

anti-neoplastic drug use the patients in &population_ds dataset.*/

data _anti_n_drug_T_00;

merge _anti_n_drug_TA_00 (in=q1) _anti_n_drug_TB_01 (in=q2);

by &id_var anti_n_date;

if q1 and q2;

run;

/*Define the anti-neoplastic therapy lines for the specified records.*/

data _anti_n_drug_T_01;

set _anti_n_drug_T_00;

by &id_var anti_n_date;

%do j = 0 %to &anti_n_drug_all_N;

%if &j in (&all_anti_n_drugs) %then %do;

retain _prev_anti_n_drug&j.;

if first.&id_var then do;

_prev_anti_n_drug&j. = _anti_n_drug&j.;

specified_line = 1;

end;

else if _prev_anti_n_drug&j. < _anti_n_drug&j. then do;

%do k = 0 %to &anti_n_drug_all_N;

%if &k in (&all_anti_n_drugs) %then %do;

_prev_anti_n_drug&k. = _anti_n_drug&k.;

%end;

%end;

specified_line + 1;

end;

%end;

%end;

if anti_n_date = . then specified_line = 0;

run;

data _anti_n_drug_T_02;

set _anti_n_drug_T_01;

keep &id_var anti_n_date specified_line

_anti_n_drug_group1-_anti_n_drug_group&max_number_of_drugs;

run;

/******************************************************************************/

/**************** Define anti neoplastic therapy lines for both **************/

/********************* the unspecified and specified drugs ********************/

/******************************************************************************/

/*Add the unspecified records back to dataset with the specified records

and the defined specified anti-neoplastic therapy lines.*/

proc sql;

create table _anti_n_drug_04 as

select a.*, b.specified_line

from _anti_n_drug_03 as a

left join _anti_n_drug_T_02 as b

on a.&id_var = b.&id_var and

a.anti_n_date = b.anti_n_date

order by a.&id_var, a.anti_n_date;

quit;

/*

Fill in the "gaps" for the anti-neoplastic therapy line, due to added

unspecified records

Retained help varables (by &id_var):

-----------------------------------

prev_anti_n_date: Previous anti-neoplastic therapy date.

prev_specified_line: Sequential number of the latest specified line in

the previous records.

prev_line: Value of the previous specified_line variable.

Therefore it is missing, if the previous records

was an unspecified record.

prev_new_specified_line: The new sequential number of the latest specified

line. It helps to keep track on changes made in the

data step.

Aimed variable:

---------------

anti_n_line: Final sequential number of the anti-neoplastic therapy line.

It is defined in 2 data steps:

Step 1:

Calculate the correct line variable for each record, except

when the unspecified records are in between 2 specified

records in the same line. For those records, line will be

greater by 1, than the line for the 2 specified records.

Step 2:

Correct the line for these records, so they take the same

line value as the 2 specified records.

*/

/*Step 1:*/

data _anti_n_drug_05;

set _anti_n_drug_04;

by &id_var anti_n_date;

format prev_anti_n_date date9.;

retain prev_anti_n_date prev_specified_line anti_n_line prev_line

prev_new_specified_line;

if first.&id_var then do;

anti_n_line = 1;

prev_anti_n_date = anti_n_date;

prev_line = specified_line;

prev_specified_line = specified_line;

prev_new_specified_line = specified_line;

end;

else if prev_anti_n_date + &days < anti_n_date or

(prev_specified_line ^= specified_line and specified_line ^=.)

then do;

if prev_specified_line = specified_line and specified_line ^= .

then do;

if anti_n_line ^= prev_specified_line and prev_line =.

then anti_n_line = prev_new_specified_line;

prev_anti_n_date = anti_n_date;

prev_line = specified_line;

prev_specified_line = specified_line;

if specified_line ^=. then prev_new_specified_line = anti_n_line;

end;

else do;

if prev_line = . and prev_anti_n_date + &days >= anti_n_date and

specified_line ^=. and anti_n_line ^= prev_specified_line

then do;

if prev_specified_line ^= specified_line and

prev_new_specified_line = anti_n_line then anti_n_line + 1;

prev_anti_n_date = anti_n_date;

prev_line = specified_line;

prev_specified_line = specified_line;

if specified_line ^=. then prev_new_specified_line = anti_n_line;

end;

else do;

anti_n_line + 1;

prev_line = specified_line;

prev_anti_n_date = anti_n_date;

if specified_line ^=. then do;

prev_specified_line = specified_line;

prev_new_specified_line = anti_n_line;

end;

end;

end;

end;

else do;

if prev_specified_line = specified_line and specified_line ^=. and

prev_line = . then do;

anti_n_line = prev_new_specified_line;

end;

prev_line = specified_line;

prev_anti_n_date = anti_n_date;

if specified_line ^=. then do;

prev_specified_line = specified_line;

prev_new_specified_line = anti_n_line;

end;

end;

drop prev_anti_n_date prev_specified_line prev_line prev_new_specified_line;

run;

/*Step 2:*/

proc sort data = _anti_n_drug_05;

by &id_var descending anti_n_date;

run;

data _anti_n_drug_06;

set _anti_n_drug_05;

by &id_var descending anti_n_date;

retain prev_line;

if first.&id_var then prev_line = anti_n_line;

else if prev_line < anti_n_line then anti_n_line = prev_line;

else prev_line = anti_n_line;

if specified_line = 0 then anti_n_line = 0;

drop prev_line;

run;

/*Define the start date and end date of the anti-neoplastic therapy line*/

proc sort data = _anti_n_drug_06;

by &id_var anti_n_line anti_n_date;

run;

data _anti_n_drug_07;

set _anti_n_drug_06;

by &id_var anti_n_line anti_n_date;

format anti_n_line_start date9. anti_n_line_end date9.;

retain anti_n_line_start;

if anti_n_date ^=. then do;

anti_n_line_end = min(anti_n_date + &days,&follow_up_end_date);

end;

if first.anti_n_line then do;

anti_n_line_start = anti_n_date;

end;

run;

data _anti_n_drug_08;

set _anti_n_drug_07;

by &id_var anti_n_line_start;

if last.anti_n_line_start;

drop anti_n_drug_group number_of_drugs specified_line anti_n_date;

run;

proc sort data = _anti_n_drug_08;

by &id_var descending anti_n_line;

run;

data _anti_n_drug_09;

set _anti_n_drug_08;

by &id_var descending anti_n_line;

format prev_anti_n_line_start date9.;

retain prev_anti_n_line_start;

if first.&id_var then prev_anti_n_line_start = anti_n_line_start;

else if anti_n_line_end >= prev_anti_n_line_start then do;

anti_n_line_end = prev_anti_n_line_start - 1;

prev_anti_n_line_start = anti_n_line_start;

end;

else prev_anti_n_line_start = anti_n_line_start;

anti_n_line_duration = anti_n_line_end - anti_n_line_start;

keep &id_var anti_n_line_start anti_n_line_end anti_n_line anti_n_line_duration;

run;

proc sort data = _anti_n_drug_09;

by &id_var anti_n_line;

run;

/*Retreive information on the anti-neoplastic drugs, the anti-neoplastic therapy

line was based on.*/

proc transpose data = _anti_n_drug_03

out = _anti_n_drug_TC_00(drop = _NAME_)

prefix = _anti_n_drug_group;

var anti_n_drug_group;

by &id_var anti_n_date;

run;

proc sql;

create table _anti_n_drug_10 as

select a.anti_n_line, b.*

from _anti_n_drug_07 as a

left join _anti_n_drug_TC_00 as b

on a.&id_var = b.&id_var and

a.anti_n_date = b.anti_n_date

order by b.&id_var, a.anti_n_line, b.anti_n_date;

quit;

data _anti_n_drug_11;

set _anti_n_drug_10;

by &id_var anti_n_line;

array cd _anti_n_drug_group:;

array anti_n_drug_group {&max_number_of_drugs};

retain anti_n_drug_group: Specified;

if first.anti_n_line then do;

Specified = 0;

if cd(1) ^= 0 then do;

Specified = 1;

do i = 1 to &max_number_of_drugs;

anti_n_drug_group{i} = cd(i);

end;

end;

else do;

do i = 1 to &max_number_of_drugs;

anti_n_drug_group{i} = cd(i);

end;

end;

end;

else if Specified = 0 then do;

if cd(1) ^= 0 then do;

Specified = 1;

do i = 1 to &max_number_of_drugs;

anti_n_drug_group{i} = cd(i);

end;

end;

end;

run;

data _anti_n_drug_12;

set _anti_n_drug_11;

by &id_var anti_n_line;

if last.anti_n_line;

keep &id_var anti_n_line anti_n_drug_group:;

run;

/*Create the final table.*/

proc sql;

create table &out_ds. as

select *

from _anti_n_drug_09 as a

left join _anti_n_drug_12 as b

on a.&id_var = b.&id_var and

a.anti_n_line = b.anti_n_line;

quit;

/*Create long formatted dataset, if the macro variable &long_format = y.*/

%if &long_format = y %then %do;

data _anti_n_line_L_00;

set _anti_n_drug_06;

by &id_var anti_n_date;

if first.anti_n_date;

drop anti_n_drug_group specified_line;

run;

proc sql;

create table _anti_n_line_L_01 as

select a.*, b.anti_n_line_start, b.anti_n_line_end, b.anti_n_line_duration

from _anti_n_line_L_00 as a

left join _anti_n_drug_09 as b

on a.&id_var = b.&id_var and

a.anti_n_line = b.anti_n_line;

quit;

proc sql;

create table &out_ds._L as

select a.*, b.*

from _anti_n_line_L_01 as a

left join _anti_n_drug_TC_00 as b

on a.&id_var = b.&id_var and

a.anti_n_date = b.anti_n_date;

quit;

%end;

/*Delete temporary datasets, if the macro variable &del = y.*/

%if &del = y %then %do;

proc datasets nodetails nolist;

delete _anti_n_drug_: _freq_anti_n_drug_group_: _freq_number_of_drugs_:

_anti_n_drug_T: _anti_n_line_L_:;

run;

quit;

%end;

%put;

%put Macro &sysmacroname has ended;

%put;

%mend anti_neoplastic_therapy_line;

/*********************************************************************************/

/*

Example:

This is an example of using the macro on a simulated population. The simulated

population syntax should be run before the macro. This syntax creates the 2 datasets,

which can be used as parameters population_ds (simulated_population) and

anti_n_drug_ds (simulated_population_anti_n_drugs) for the

%anti_neoplastic_therapy_line_algorithm() macro. But you can skip this simulation

step, if you'd like to use your own data to test the algorithm.

Simulate a population for testing:

----------------------------------

*/

/*

%let &Syntax_path = 'the path to the folder with the population simulation syntax';

%include "&Syntax_path\Population_simulation.sas";

*/

/*

Run the anti-neoplastic therapy line macro with the simulated population:

--------------------------------------------------------------

*/

/*

%anti_neoplastic_therapy_line(

population_ds = simulated_population,

anti_n_drug_ds = simulated_population_a_n_drugs,

out_ds = anti_n_line_ds,

id_var = id,

index_date = index_date,

follow_up_end_date = follow_up_end_date,

days = 45,

long_format = y,

del = y

);

*/

/**********************************************************************************/

**Appendix 6: SAS code for population simulation**

/*************************************************************************************

** DESCRIPTION:

** Simulate a population with random number of anti-neoplastic therapy lines within

** a specific follow-up interval. This population can be used to test

** the macro %anti_neoplastic_therapy_line_algorithm(). The simulated population is

** generated in 2 major steps.

** First, it creates an "ideal" anti-neoplastic therapy dataset, where

** every patient has a perfect set of records on anti-neoplastic therapy with only

** specified anti-neoplastic drug groups and without drugs taken off

** treatment within the same line.

** Second, it generates "noise" in the ideal dataset to make it more

** realistic and useful for testing the features of the anti-neoplastic therapy line

** algorithm.

**

** In the simulated data (simulated_population_final) each line has an:

** id: patients' id

** _anti_n_line: Sequential number of the anti-neoplastic therapy line

** anti_n_line_start: Start date of the line

** anti_n_line_end: End date of the line

** anti_n_date: Date of anti-neoplastic therapy

** _anti_n_record_number: Sequential number of the anti-neoplastic therapy within

** it's line

**

** As a last step, the simulated data is split into two datasets, which can be

** used to test the macro %anti_neoplastic_therapy_line_algorithm():

** simulated_population

** simulated_population_anti_n_drugs

**

** Random variables:

** -----------------

** j: Random number of anti-neoplastic therapy lines (generated

** for each patient id). The name of this variable in the

** final dataset is _anti_n_line.

** k: Random number of anti-neoplastic therapy records in the

** anti-neoplastic therapy line (generated for each

** anti-neoplastic therapy line). The name of this variable

** in the final dataset is _anti_n_record_number.

**

**************************************************************************************

** AUTHOR: Bianka Darvalics

** CREATION DATE: 16.10.2019

**************************************************************************************

*************************************************************************************/

/*

Predefined macro variables:

---------------------------

Note, that these are arbitrary values, and can be changed, if some other

characteristics seem more reasonable.

*/

/*Number of patient id-s with both specified and unspecified anti-neoplastic

drug records.*/

%let N = 100000;

/*Number of patient id-s with only unspecified anti-neoplastic drug records.*/

%let M = 50000;

/*Seed for generated random values.*/

%let seed = 123;

/*Maximum number of anti-neoplastic therapy lines a patient can have in the dataset.*/

%let max_line_num = 7;

/*Maximum number of anti-neoplastic drugs a patient can receive on the same date.*/

%let max_number_of_drugs = 5;

/*Overall number of distinct anti-neoplastic drug codes used in the dataset.

The possible drug codes will be generated as a sequence:

0, 1, 2, 3, ..., &anti_n_drug_all_N.*/

%let anti_n_drug_all_N = 101;

/*Number of days allowed between 2 consecutive anti-neoplastic therapy records to

consider them as records from the same line.*/

%let days = 45;

/*Start date of the interval for the first anti-neoplastic therapy record.*/

%let anti_n_interval_start = mdy(1,1,2005);

/*End date of the interval for the first anti-neoplastic therapy record.*/

%let anti_n_interval_end = mdy(1,1,2010);

/*Start date of follow-up.*/

%let follow_up_start_date = mdy(12,31,2004);

/*End date of follow-up. Patients shouldn't have anti-neoplastic therapy records

after this date.*/

%let follow_up_end_date = mdy(12,31,2019);

/***** Create an ideal anti-neoplastic therapy dataset ************************/

data _simulated_population_00(rename=(i=id j=_anti_n_line k=_anti_n_record_number));

call streaminit(&seed);

format anti_n_line_start anti_n_line_end anti_n_date date9.;

do i = 1 to &N;

retain prev_anti_n_line_end anti_n_date;

a = &anti_n_interval_start;

b = &anti_n_interval_end;

prev_anti_n_line_end = a + floor((b-a) * rand('Uniform'));

do j = 1 to min(round(1 + rand('Poisson',1)),&max_line_num)

until (prev_anti_n_line_end >= &follow_up_end_date - &days);

anti_n_line_start = prev_anti_n_line_end + round(200 * (rand('Uniform')));

do k = 1 to min(round(1 + abs(rand('Normal',10,5))),30);

if k = 1 then anti_n_date = anti_n_line_start;

else do;

anti_n_date =

min(anti_n_date + max(abs(round(rand('Normal',30,20))),1),

&follow_up_end_date - &days);

end;

anti_n_line_end = anti_n_date + &days;

output;

end;

prev_anti_n_line_end = anti_n_line_end;

end;

end;

drop prev_anti_n_line_end a b;

run;

/*Delete those records that were after the end of follow-up date - &days.*/

proc sort data = _simulated_population_00 nodupkey;

by id anti_n_line_start anti_n_line_end anti_n_date;

run;

data _simulated_population_01;

set _simulated_population_00;

by id anti_n_line_start anti_n_line_end;

if first.anti_n_line_end;

run;

data _simulated_population_02;

set _simulated_population_01;

by id anti_n_line_start anti_n_line_end;

if last.anti_n_line_start;

run;

proc sort data = _simulated_population_02;

by id descending _anti_n_line;

run;

data _simulated_population_03;

set _simulated_population_02;

by id descending _anti_n_line;

retain prev_anti_n_line_start;

if first.id then prev_anti_n_line_start = anti_n_line_start;

else if anti_n_line_end >= prev_anti_n_line_start then do;

anti_n_line_end = prev_anti_n_line_start - 1;

prev_anti_n_line_start = anti_n_line_start;

end;

else prev_anti_n_line_start = anti_n_line_start;

keep id anti_n_line_start anti_n_line_end _anti_n_line;

run;

proc sort data = _simulated_population_03;

by id _anti_n_line;

run;

proc sql;

create table _simulated_population_04 as

select a.id, a.anti_n_line_start, b.anti_n_line_end, a.anti_n_date,

a._anti_n_line, a._anti_n_record_number

from _simulated_population_01 as a

left join _simulated_population_03 as b

on a.id = b.id and a.anti_n_line_start = b.anti_n_line_start

order by a.id, a._anti_n_line, a.anti_n_date;

quit;

/*

Generate anti-neoplastic drugs for each line. For each anti-neoplastic therapy

line a random number of anti-neoplastic drugs

(maximum number = &max_number_of_drugs) will be chosen without replacement

from the possible anti_n drug list (&list_of_anti_n_drugs) and they will be

retained through out all anti-neoplastic therapy dates within the line.

This way each patient id will have "perfect" records within the line.

Macro variables:

----------------

list_of_anti_n_drugs: List of possible anti-neoplastic drugs.

max_number_of_drugs: Maximum number of anti-neoplastic drugs is plausible to

have within one line.

Random variables:

-----------------

num_of_drugs_in_line: Random number of anti-neoplastic drugs asigned to the line.

_anti_n_drug_group{i}: Random anti-neoplastic drug chosen without replacement.

index_random_drug: Random index to point on a number in the decreasing list of

anti_nthereutic drugs.

Other help varables:

--------------------

drug_list: Overall anti-neoplastic drug list.

drug_list_WOR: Decreasing list of anti-neoplastic drugs (due to without

replacement technic).

length_drug_list: Length of the decreasing list of anti-neoplastic drugs.

*/

/*Create a macro variable with all the possible anti-neoplastic drug groups

in one string separated by $ $, like: "$1$ $2$ $3$ $4$...$&anti_n_drug_all_N$".*/

data _dummy_anti_n_drug_(rename=(i=anti_n_drug_group));

do i = 1 to &anti_n_drug_all_N;

output;

end;

run;

proc sql noprint;

select anti_n_drug_group into :list_of_anti_n_drugs separated by '$ $'

from _dummy_anti_n_drug_;

quit;

%let list_of_anti_n_drugs = $&list_of_anti_n_drugs$;

%put &list_of_anti_n_drugs;

data _simulated_population_05;

set _simulated_population_04;

by id _anti_n_line;

array _anti_n_drug_group {&max_number_of_drugs};

retain _anti_n_drug_group: num_of_drugs_in_line drug_list_WOR;

drug_list = "&list_of_anti_n_drugs.";

/*Intialize the entire drug list [1:&anti_n_drug_all_N].*/

if first.id then drug_list_WOR = "&list_of_anti_n_drugs.";

if first._anti_n_line then do;

num_of_drugs_in_line = min(round(1 + abs(rand('Normal',0,1))),&max_number_of_drugs);

do i = 1 to &max_number_of_drugs;

if i <= num_of_drugs_in_line

then do;

length_drug_list = countw(drug_list_WOR);

index_random_drug = max(ceil(length_drug_list * rand('Uniform')),1);

_anti_n_drug_group{i} = scan(drug_list_WOR,index_random_drug);

word = "$"||trim(left(put(_anti_n_drug_group{i},3.)))||"$";

drug_list_WOR = tranwrd(drug_list_WOR,trim(word),"");

end;

else _anti_n_drug_group{i} =.;

end;

end;

drop i drug_list drug_list_WOR index_random_drug length_drug_list word;

run;

/***** Generate some noise in the ideal dataset ***************************/

/*

Step 1:

-------

Randomly remove some anti-neoplastic drugs from random records (except for

the first record in the line) within the anti-neoplastic therapy line. This

way the algorithm will be testable on those cases where the patients have

some drugs removed (and possibly added back later on) from their therapy

due to eg. side effects.

Step 2:

-------

Define a random interval [interval_start, interval_end] within records

could be randomly set to unspecified anti-neoplastic drugs. This way the

algorithm will be testable on those cases, where the patient has an

unspecified record between (at least) 2 specified records for the same

anti-neoplastic therapy line.

Step 3:

-------

Define the previous anti-neoplastic therapy date (prev_anti_n_date) and the

next anti-neoplastic therapy date (next_anti_n_date) for each anti-neoplastic

therapy record within the line. Randomly set some specified anti-neoplastic

therapy records to unspecified, if the record fulfills the &days-criteria,

eg. there's no more than &days has ellapsed since previous or next specified

anti-neoplastic therapy record. This way the algorithm will be testable

on those cases, where the patient has an unspecified record "close" enough

(within prespecified &days days) to a specified record, which suggest it

belongs to the same anti-neoplastic therapy line.

Step 4:

-------

Simulate data with only unspecified drugs, and add it to the other

simulated dataset.

*/

/****** Step 1 ***********/

/*

Calculated variable:

--------------------

num_of_records_in_line: Number of anti-neoplastic therapy records in the line.

num_of_drugs_deleted: Number of anti-neoplastic drugs that could be

potentially removed.

*/

proc sql;

create table _simulated_population_06 as

select *, count(_anti_n_line) as num_of_records_in_line

from _simulated_population_05

group by id, _anti_n_line

order by id, _anti_n_line, anti_n_date;

quit;

data _simulated_population_07;

set _simulated_population_06;

by id _anti_n_line;

retain num_of_drugs_deleted;

if first._anti_n_line then

num_of_drugs_deleted = 1 + floor((num_of_drugs_in_line - 1) * rand('Uniform'));

run;

data _simulated_population_08;

set _simulated_population_07;

array cd _anti_n_drug_group: ;

call streaminit(&seed);

if num_of_drugs_in_line > 1 and _anti_n_record_number > 1 then do;

do i = 1 to num_of_drugs_deleted;

j = max(ceil(num_of_drugs_in_line * rand('Uniform')),1);

LessDrug = rand('Binomial',.30,1);

if LessDrug = 1 then cd(j) =.;

end;

end;

drop i j;

run;

/****** Step 2 ***********/

data _simulated_population_09;

set _simulated_population_08;

by id _anti_n_line anti_n_date;

array cd _anti_n_drug_group: ;

retain modify_yn interval_start interval_end;

call streaminit(&seed);

if first._anti_n_line then do;

modify_yn = rand('Binomial',.50,1);

interval_start = 1 + floor((num_of_records_in_line-1) * rand('Uniform'));

interval_end = interval_start +

floor((num_of_records_in_line-interval_start) * rand('Uniform'));

end;

run;

data _simulated_population_10;

set _simulated_population_09;

array cd _anti_n_drug_group: ;

if interval_start < _anti_n_record_number < interval_end and modify_yn = 1

then do;

do i = 1 to num_of_drugs_in_line;

if i = 1 then cd(i) = 0;

else cd(i) = .;

end;

end;

drop modify_yn;

run;

/****** Step 3 ***********/

data _simulated_population_11;

set _simulated_population_10;

by id _anti_n_line anti_n_date;

retain _anti_n_date;

format prev_anti_n_date date9.;

if first._anti_n_line then _anti_n_date = anti_n_date;

else do;

prev_anti_n_date = _anti_n_date;

_anti_n_date = anti_n_date;

end;

drop _anti_n_date;

run;

proc sort data = _simulated_population_11;

by id descending _anti_n_line descending anti_n_date;

run;

data _simulated_population_12;

set _simulated_population_11;

by id descending _anti_n_line descending anti_n_date;

retain _anti_n_date;

format next_anti_n_date date9.;

if first._anti_n_line then _anti_n_date = anti_n_date;

else do;

next_anti_n_date = _anti_n_date;

_anti_n_date = anti_n_date;

end;

drop _anti_n_date;

run;

proc sort data = _simulated_population_12;

by id _anti_n_line anti_n_date;

run;

data _simulated_population_13;

set _simulated_population_12;

array cd _anti_n_drug_group: ;

call streaminit(&seed);

modify_bef = rand('Binomial',.50,1);

modify_aft = rand('Binomial',.50,1);

if _anti_n_record_number < interval_start and modify_bef = 1 and LessDrug = 0

and next_anti_n_date <= anti_n_date + &days then do;

do i = 1 to num_of_drugs_in_line;

if i = 1 then cd(i) = 0;

else cd(i) = .;

end;

end;

else if _anti_n_record_number > interval_end and modify_aft = 1 and LessDrug = 0

and anti_n_date <= prev_anti_n_date + &days then do;

do i = 1 to num_of_drugs_in_line;

if i = 1 then cd(i) = 0;

else cd(i) = .;

end;

end;

keep id anti_n_line_start anti_n_line_end _anti_n_line anti_n_date

_anti_n_drug_group: num_of_drugs_in_line;

run;

/*Create long formated data from the final version of the simulated data

with the noise*/

data _simulated_population_14;

set _simulated_population_13;

array cd _anti_n_drug_group: ;

do i = 1 to num_of_drugs_in_line;

if cd(i) ^=. then do;

anti_n_drug_group = cd(i);

output;

end;

end;

drop i num_of_drugs_in_line _anti_n_drug_group:;

run;

/****** Step 4 ***********/

data _simulated_population_15(rename=(i=id j=_anti_n_line k=_anti_n_record_number));

call streaminit(&seed);

format anti_n_line_start anti_n_line_end anti_n_date date9.;

do i = &N + 1 to &N + &M;

retain prev_anti_n_line_end anti_n_date;

a = &anti_n_interval_start;

b = &anti_n_interval_end;

prev_anti_n_line_end = a + floor((b-a) * rand('Uniform'));

do j = 1 to min(round(1 + rand('Poisson',1)),&max_line_num)

until (prev_anti_n_line_end >= &follow_up_end_date - &days);;

anti_n_line_start = prev_anti_n_line_end + max(round(200 * (rand('Uniform'))),&days+1);

do k = 1 to min(round(1 + abs(rand('Normal',10,5))),30);

if k = 1 then anti_n_date = anti_n_line_start;

else do;

anti_n_date =

min(anti_n_date + min(max(abs(round(rand('Normal',30,20))),1),&days),

&follow_up_end_date - &days);

end;

anti_n_line_end = anti_n_date + &days;

anti_n_drug_group = 0;

output;

end;

prev_anti_n_line_end = anti_n_date;

output;

end;

end;

drop prev_anti_n_line_end a b;

run;

proc sort data = _simulated_population_15 nodupkey;

by id anti_n_line_start anti_n_line_end anti_n_date;

run;

data _simulated_population_16;

set _simulated_population_15;

by id anti_n_line_start anti_n_line_end;

if first.anti_n_line_end;

drop _anti_n_record_number;

run;

data _simulated_population_17;

set _simulated_population_16;

by id anti_n_line_start anti_n_line_end;

if last.anti_n_line_start;

run;

proc sort data = _simulated_population_17;

by id descending _anti_n_line;

run;

data _simulated_population_18;

set _simulated_population_17;

by id descending _anti_n_line;

retain prev_anti_n_line_start;

if first.id then prev_anti_n_line_start = anti_n_line_start;

else if anti_n_line_end >= prev_anti_n_line_start then do;

anti_n_line_end = prev_anti_n_line_start - 1;

prev_anti_n_line_start = anti_n_line_start;

end;

else prev_anti_n_line_start = anti_n_line_start;

keep id anti_n_line_start anti_n_line_end _anti_n_line;

run;

proc sort data = _simulated_population_18;

by id _anti_n_line;

run;

proc sql;

create table _simulated_population_19 as

select a.id, a.anti_n_line_start, b.anti_n_line_end, a.anti_n_date,

a._anti_n_line, a.anti_n_drug_group

from _simulated_population_16 as a

left join _simulated_population_18 as b

on a.id = b.id and a.anti_n_line_start = b.anti_n_line_start

order by a.id, a._anti_n_line, a.anti_n_date;

quit;

/***** Create the final dataset of the population ***************************/

data simulated_population_final;

set _simulated_population_14

_simulated_population_19;

run;

proc sort data = simulated_population_final;

by id anti_n_line_start anti_n_line_end;

run;

/*Create the 2 datasets for testing the anti-neoplastic therapy line defining

macro %anti_neoplastic_therapy_line_algorithm()*/

data simulated_population_a_n_drugs;

set simulated_population_final;

by id anti_n_line_start anti_n_line_end;

drop _anti_n_line anti_n_line_start anti_n_line_end;

run;

data simulated_population;

set simulated_population_final;

by id anti_n_line_start anti_n_line_end;

format index_date follow_up_end_date date9.;

if first.id;

index_date = &follow_up_start_date;

follow_up_end_date = &follow_up_end_date;

keep id index_date follow_up_end_date;

run;

/*Delete help datasets*/

proc datasets nodetails nolist;

delete _simulated_population_: _dummy_anti_n_drug_;

run;

quit;

**Appendix 7: Description of use of the SAS syntax files for the Drug-based algorithm for number of lines of anti-neoplastic therapy**

The first syntax (appendix 4), defines the anti-neoplastic therapy drug groups based on information on personal identifier, date of administration of anti-neoplastic therapy, and the associated Danish treatment codes from the DNPR, which are defined on the webpage: http://www.medinfo.dk/sks/brows.php. However, treatment codes might change, and new treatment codes could be included. Documentation of changes in the Danish treatment codes can be found here: https://sundhedsdatastyrelsen.dk/da/rammer-og-retningslinjer/om-klassifikationer/sks-klassifikationer/opdateringer-sks. Furthermore, some researchers might consider including drug groups, aside from those we included, e.g. immunotherapy or hormone therapy; such new drug groups could be included in this syntax. However, such additions should ideally be validated. The second syntax (appendix 5) defines the start date and the last date for each line of anti-neoplastic therapy, the line number, duration of each line, and the drugs used in each line. This part of the syntax can also be used on data where anti-neoplastic therapy drug groups are defined from treatment code systems other than those used in Denmark. The third syntax (appendix 6), simulates a population, which can be used to test the two other syntaxes.
